# Supplementary material for: Micrococcus luteus-derived extracellular vesicles attenuate neutrophilic asthma by regulating miRNAs in airway epithelial cells
Source: Springer Nature journal article supplement (doi:10.1038/s12276-022-00910-0), 2023-01-13
Supplement: MOESM1 [file 12276_2022_910_MOESM1_ESM.pdf]

## Supplementary Information

### ***Micrococcus luteus*-derived extracellular vesicles attenuate neutrophilic asthma by regulating miRNAs in airway epithelial cells**

Soyoon Sim,<sup>1,2</sup> Dong-Hyun Lee,<sup>1,2</sup> Kwang-sun Kim,<sup>3</sup> Hyeon Ju Park,<sup>4</sup> Yoon-Keun Kim,<sup>4</sup>  
Youngwoo Choi,<sup>1\*</sup> Hae-Sim Park<sup>1,2\*</sup>

<sup>1</sup>Department of Allergy and Clinical Immunology, Ajou University School of Medicine, Suwon, Korea

<sup>2</sup>Department of Biomedical Sciences, Graduate School of Ajou University, Suwon, Korea

<sup>3</sup>Department of Chemistry and Chemistry Institute for Functional Materials, Pusan National University, Busan, Korea

<sup>4</sup>MD Healthcare Inc., Seoul, Korea

\*These authors equally contributed to this work

#### **Corresponding authors:**

Youngwoo Choi PhD

Department of Allergy and Clinical Immunology, Ajou University School of Medicine, 164  
Worldcup-ro, Suwon, Korea

Tel: +82-31-219-4277,

Fax: +82-31-219-4407,

Email: cyw3789@gmail.com

Hae-Sim Park MD, PhD

Department of Allergy and Clinical Immunology, Ajou University School of Medicine, 164

Worldcup-ro, Suwon, Korea

Tel: +82-31-219-5196,

Fax: +82-31-219-5154,

Email: [hspark@ajou.ac.kr](mailto:hspark@ajou.ac.kr)

**Supplementary Table 1: Proteomic analysis of 10 most abundant MIEV components**

| Description                                                                    | Ensembl Gene ID | Q-value:<br>Combined | Sum PEP<br>score | MW<br>[kDa] | Coverage<br>[%] | # Peptides | #<br>PSM | # Unique<br>Peptides |
|--------------------------------------------------------------------------------|-----------------|----------------------|------------------|-------------|-----------------|------------|----------|----------------------|
| Extracellular solute-binding protein                                           | Mlut_15570      | 0                    | 679.165          | 66.6        | 75              | 52         | 1455     | 52                   |
| Formaldehyde dehydrogenase                                                     | Mlut_04320      | 0                    | 388.074          | 42.6        | 73              | 24         | 741      | 24                   |
| Subtilase family protease                                                      | Mlut_02600      | 0                    | 435.808          | 101.2       | 51              | 41         | 666      | 41                   |
| ABC-type Fe <sup>3+</sup> -hydroxamate transport system, periplasmic component | Mlut_22080      | 0                    | 299.04           | 37.5        | 84              | 19         | 558      | 19                   |
| Isocitrate dehydrogenase [NADP]                                                | Mlut_04530      | 0                    | 978.427          | 79.8        | 81              | 68         | 745      | 68                   |
| Dihydrolipoyl dehydrogenase                                                    | Mlut_13320      | 0                    | 707.000          | 48.9        | 75              | 47         | 652      | 47                   |
| 5'-nucleotidase/2',3'-cyclic phosphodiesterase-like hydrolase                  | Mlut_03620      | 0                    | 486.902          | 77.4        | 52              | 29         | 316      | 29                   |
| Acetyl-coenzyme A synthetase                                                   | Mlut_18230      | 0                    | 469.481          | 71.0        | 47              | 32         | 463      | 32                   |
| ABC-type dipeptide transport system, periplasmic component                     | Mlut_01730      | 0                    | 267.917          | 60.6        | 53              | 20         | 184      | 20                   |
| Glyceraldehyde-3-phosphate dehydrogenase                                       | Mlut_11350      | 0                    | 350.721          | 36.7        | 80              | 24         | 412      | 24                   |

ABC, ATP-binding cassette; MIEV, *Micrococcus luteus*-derived extracellular vesicles; MW, molecular weight; PEP, posterior error probability; PSM, peptide-spectrum match.

**Supplementary Table 2: Demographic data of the study subjects according to asthma phenotypes**

| Variables         | HCS<br>(n = 40) | Asthmatics<br>(n = 45) | <i>P</i> value | EA<br>(n = 25) | NA<br>(n = 20) | <i>P</i> value |
|-------------------|-----------------|------------------------|----------------|----------------|----------------|----------------|
| Age (y)           | 41.1 ± 16.1     | 44.0 ± 17.6            | .782           | 38.2 ± 16.6    | 44.8 ± 15.0    | .180           |
| Female sex (%)    | 47.5            | 55.6                   | .458           | 56.0           | 55.0           | .947           |
| Atopy (%)         | 47.5            | 55.6                   | .173           | 72.0           | 50.0           | .130           |
| Severe asthma (%) | ND              | 62.2                   | ND             | 16.0           | 10.0           | .556           |
| Baseline FEV1 (%) | 106.3 ± 12.9    | 13.3                   | .004           | 95.8 ± 19.1    | 93.2 ± 15.7    | .632           |
| PC20 (mg/mL)      | ND              | 94.7 ± 17.5            | ND             | 5.2 ± 6.3      | 5.7 ± 2.9      | .759           |
| Sputum Eos (%)    | ND              | 11.6 ± 16.5            | ND             | 19.4 ± 18.1    | 0.8 ± 0.9      | .001           |
| Sputum Neu (%)    | ND              | 54.5 ± 30.1            | ND             | 34.3 ± 24.7    | 79.8 ± 11.0    | .001           |
| Total IgE (IU/mL) | 102.4 ± 93.1    | 511.6 ± 527.2          | .001           | 544.6 ± 544.8  | 248.3 ± 269.1  | .025           |
| ECP (ng/mL)       | 38.6 ± 52.8     | 412.9 ± 470.5          | .003           | 211.9 ± 230.8  | 42.6 ± 66.7    | .002           |
| MPO (ng/mL)       | 198.2 ± 89.1    | 273.8 ± 109.8          | .019           | 223.6 ± 83.9   | 339.8 ± 184.6  | .045           |

Values are given as n (%) for categorical variables and as mean ± SD for continuous variables.

*P* values were applied by Pearson chi-square test for categorical variables and Student's *t* test for continuous variables.

HCS, healthy control subjects; EA, eosinophilic asthma; NA, neutrophilic asthma; FEV1, forced expiratory volume in 1 s; methacholine PC20, the provocative concentration of methacholine required to cause a 20% fall in FEV1; Eos, eosinophils; Neu, neutrophils; IgE, immunoglobulin E; ECP, eosinophil cationic protein; MPO, myeloperoxidase; ND, not data.

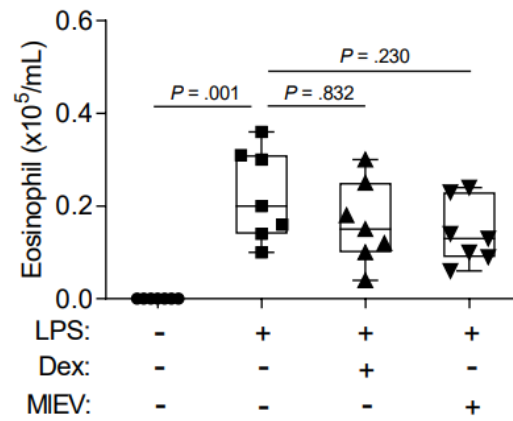

**Supplementary Fig. 1 Eosinophil numbers in the bronchoalveolar lavage fluid of mice.**

Data are presented as box plots, n = 7. *P* values were obtained by one-way ANOVA with Bonferroni's *post hoc* test. Dex, dexamethasone; LPS, lipopolysaccharide; MIEV, *Micrococcus luteus*-derived extracellular vesicle.

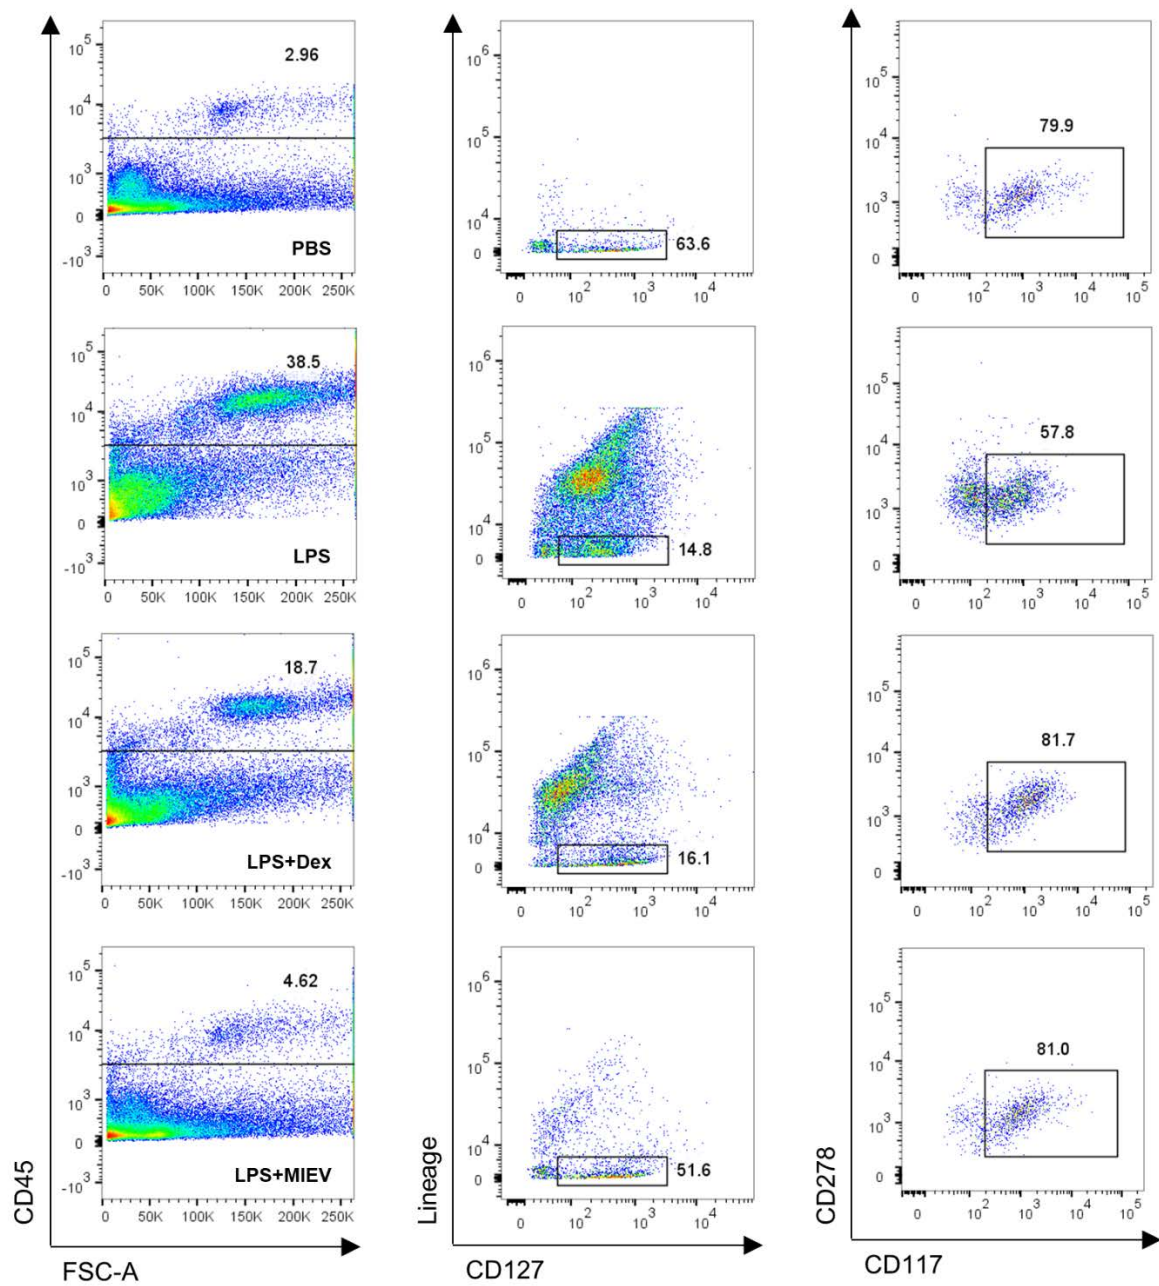

**Supplementary Fig. 2 Quantification of ILC3s in the lung tissues of mice.** The cells were defined by expression of CD45, CD127/IL-7R $\alpha$ , and CD117/c-kit, but lack of lineage markers and CD278/ICOS. PBS, phosphate buffered saline.

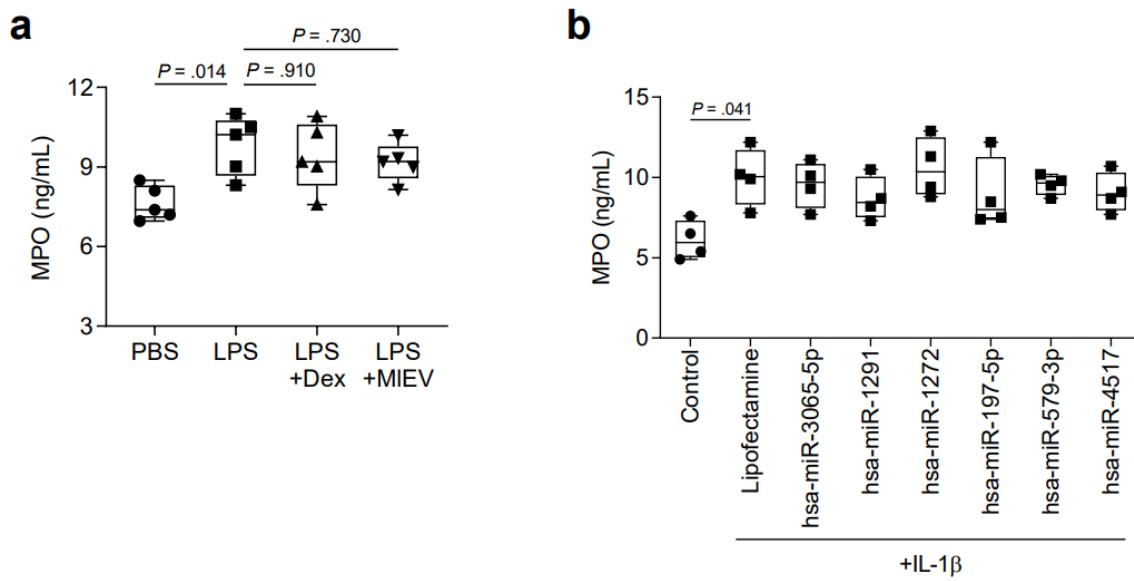

**Supplementary Fig. 3 Effect of MIEVs or MiRNAs on human peripheral neutrophils. a**

Levels of MPO in culture supernatants of neutrophils treated with Dex or MIEV in the presence of LPS. Data are presented as box plots,  $n = 5$ .  $P$  values were obtained by one-way ANOVA with Bonferroni's *post hoc* test. **b** Levels of MPO in neutrophils transfected with various miRNAs in the presence of IL-1 $\beta$ . Data are presented as box plots,  $n = 4$ .  $P$  values were obtained by one-way ANOVA with Bonferroni's *post hoc* test. MPO, myeloperoxidase.

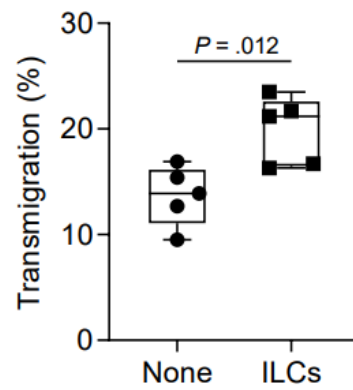

**Supplementary Fig. 4** The percentage of migrating neutrophils in the presence of ILCs.

Data are presented as box plots,  $n = 5$ .  $P$  values were obtained by Student's  $t$  test.
